# Supplementary material
Source: Springer Nature journal article supplement (https://www.springermedizin.de/resource/supplementary/13014_2011_379_MOESM3_ESM.pdf/9633680)

**mean number of gamma-H2AX foci per nucleus**

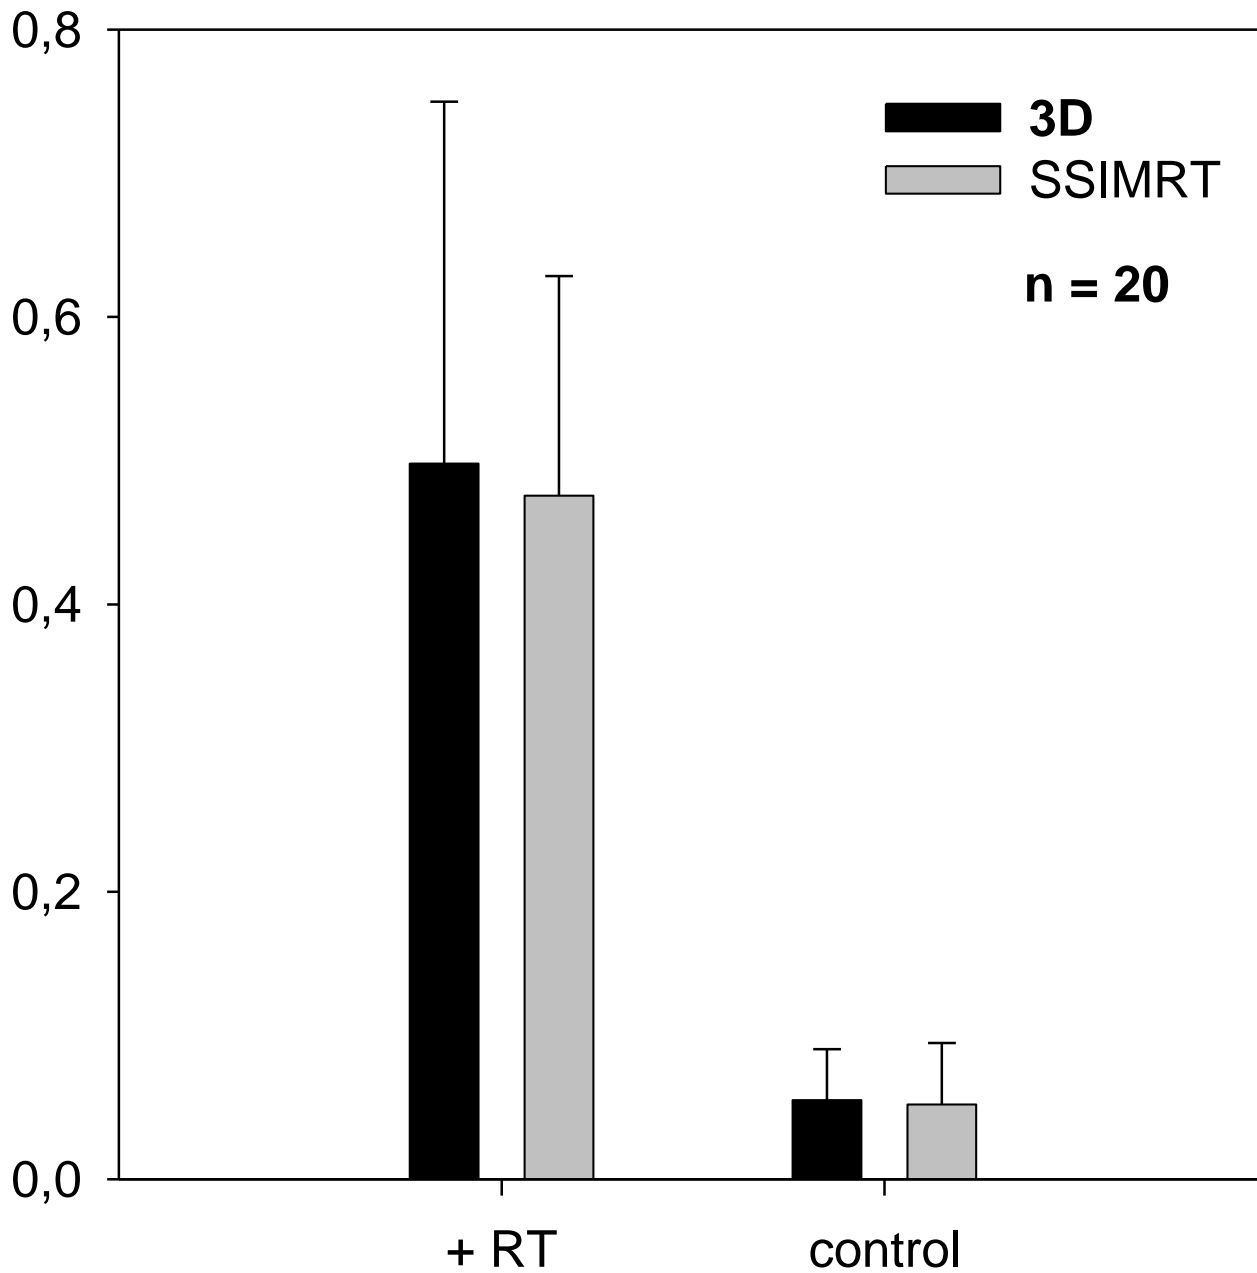

Supplement: MOESM3 [file 9633680]
